# Supplementary material for: Validity of Hololens Augmented Reality Head Mounted Display for Measuring Gait Parameters in Healthy Adults and Children with Cerebral Palsy
Source: MDPI journal article supplement (doi:10.3390/s21082697), 2021-04-11
Supplement: s1 [file s1]

## **Raw and preprocessed time series of the Interactive Walkway and HoloLens**

*Supplementary material to: Daphne J. Geerse, Bert Coolen, and Melvyn Roerdink. Quantifying spatiotemporal gait parameters with HoloLens in healthy adults and people with Parkinson's disease: test-retest reliability, concurrent validity and face validity. Sensors.*

---

### GENERAL INFORMATION

---

Daphne J. Geerse

E-mail: d.j.geerse@vu.nl

Bert Coolen

E-mail: h.coolen@vu.nl

Melvyn Roerdink

E-mail: m.roerdink@vu.nl

Department of Human Movement Sciences

Faculty of Behavioural and Movement Sciences

Vrije Universiteit Amsterdam

Amsterdam Movement Sciences

Van der Boechorststraat 7

1081 BT Amsterdam

---

### DATA OVERVIEW

---

Participants:

- HYA\_.. = healthy young adult (n = 22)
- PD\_.. = person with Parkinson's disease (n = 23)

Conditions:

- SWS1/SWS2 = slow walking speed trial 1/2
- CWS1/CWS2 = comfortable walking speed trial 1/2

- FWS1/FWS2 = fast walking speed trial 1/2

People with Parkinson's disease only performed comfortable walking speed trials.

Every trial consists of three files (see below for detailed descriptions):

- Preprocessed data as used in the study (Example filename: HYA\_01\_SWS1.csv)
- Raw Interactive Walkway data (Example filename: HYA\_01\_SWS1\_IWW\_raw.csv)
- Raw HoloLens data (Example filename: HYA\_01\_SWS1\_HoloLens\_raw.csv)

-----  
PREPROCESSED DATA  
-----

Example filename: HYA\_01\_SWS1.csv

Preprocessed body points' time series of the Interactive Walkway and time series of the position of the HoloLens in the x-, y- and z-direction. Time series presented are temporally and spatially aligned between systems and preprocessed as detailed in the main text. Body points' time series of the Interactive Walkway are interpolated with a spline algorithm.

The columns represent:

- |                      |                           |
|----------------------|---------------------------|
| 1) SpineBase (x)     | 9) SpineBase (z)          |
| 2) AnkleLeft (x)     | 10) AnkleLeft (z)         |
| 3) AnkleRight (x)    | 11) AnkleRight (z)        |
| 4) SpineShoulder (x) | 12) SpineShoulder (z)     |
| 5) SpineBase (y)     | 13) HoloLens position (x) |
| 6) AnkleLeft (y)     | 14) HoloLens position (y) |
| 7) AnkleRight (y)    | 15) HoloLens position (z) |
| 8) SpineShoulder (y) |                           |

x = anterior-posterior direction (values increase from start to finish on the walkway)

y = vertical direction (values increase from floor to ceiling)

z = mediolateral direction (values increase from the left border to the right border on the walkway)

-----  
RAW INTERACTIVE WALKWAY DATA  
-----

Example filename: HYA\_01\_SWS1\_IWW\_raw.csv

'Raw' time series of 19 body points of the Interactive Walkway in the x-, y- and z-direction. Time series are preprocessed as detailed in the main text, but body points' time series are not interpolated with a spline algorithm.

The columns represent:

|                       |                       |                       |
|-----------------------|-----------------------|-----------------------|
| 1) SpineBase (x)      | 20) SpineBase (y)     | 39) SpineBase (z)     |
| 2) Head (x)           | 21) Head (y)          | 40) Head (z)          |
| 3) ShoulderLeft (x)   | 22) ShoulderLeft (y)  | 41) ShoulderLeft (z)  |
| 4) ElbowLeft (x)      | 23) ElbowLeft (y)     | 42) ElbowLeft (z)     |
| 5) WristLeft (x)      | 24) WristLeft (y)     | 43) WristLeft (z)     |
| 6) HandLeft (x)       | 25) HandLeft (y)      | 44) HandLeft (z)      |
| 7) ShoulderRight (x)  | 26) ShoulderRight (y) | 45) ShoulderRight (z) |
| 8) ElbowRight (x)     | 27) ElbowRight (y)    | 46) ElbowRight (z)    |
| 9) WristRight (x)     | 28) WristRight (y)    | 47) WristRight (z)    |
| 10) HandRight (x)     | 29) HandRight (y)     | 48) HandRight (z)     |
| 11) HipLeft (x)       | 30) HipLeft (y)       | 49) HipLeft (z)       |
| 12) KneeLeft (x)      | 31) KneeLeft (y)      | 50) KneeLeft (z)      |
| 13) AnkleLeft (x)     | 32) AnkleLeft (y)     | 51) AnkleLeft (z)     |
| 14) FootLeft (x)      | 33) FootLeft (y)      | 52) FootLeft (z)      |
| 15) HipRight (x)      | 34) HipRight (y)      | 53) HipRight (z)      |
| 16) KneeRight (x)     | 35) KneeRight (y)     | 54) KneeRight (z)     |
| 17) AnkleRight (x)    | 36) AnkleRight (y)    | 55) AnkleRight (z)    |
| 18) FootRight (x)     | 37) FootRight (y)     | 56) FootRight (z)     |
| 19) SpineShoulder (x) | 38) SpineShoulder (y) | 57) SpineShoulder (z) |

x = anterior-posterior direction (values increase from start to finish on the walkway)

y = vertical direction (values increase from floor to ceiling)

z = mediolateral direction (values increase from the left border to the right border on the walkway)

-----  
RAW HOLOLENS DATA  
-----

Example filename: HYA\_01\_SWS1\_HoloLens\_raw.csv

Raw time series the position and orientation of the HoloLens.

The columns represent:

- 1) Time (in sec)
- 2) HoloLens position (x)
- 3) HoloLens position (y)
- 4) HoloLens position (z)
- 5) HoloLens orientation (x)
- 6) HoloLens orientation (y)
- 7) HoloLens orientation (z)
